# Supplementary material for: Burnout and Quality of Work Life among Physicians during Internships in Public Hospitals in Thailand
Source: MDPI journal article supplement (doi:10.3390/bs14050361), 2024-04-25
Supplement: s1 [file s1]

**Table S1.** The reliability test of seven quality of work-life (QWL) subscales.

| Subscales                             | Items | Cronbach's Alpha  |               |
|---------------------------------------|-------|-------------------|---------------|
|                                       |       | Validation study* | Present study |
| Total scores of QWL                   | 24    | 0.94              | 0.88          |
| (1) Employee engagement (EET)         | 2     | 0.80              | 0.82          |
| (2) Control at work (CAW)             | 3     | 0.73              | 0.76          |
| (3) Homework interface (HWI)          | 3     | 0.74              | 0.69          |
| (4) General well-being (GWB)          | 4     | 0.80              | 0.62          |
| (5) Job and career satisfaction (JCS) | 6     | 0.78              | 0.74          |
| (6) Working conditions (WCS)          | 3     | 0.71              | 0.71          |
| (7) Stress at work (SAW)              | 3     | 0.53              | 0.62          |

\*The brief Thai version of the work-related quality of life scale (Brief THWRQLS) [39]
