# Supplementary material for: Burnout and Quality of Work Life among Physicians during Internships in Public Hospitals in Thailand
Source: MDPI journal article supplement (doi:10.3390/bs14050361), 2024-04-25
Supplement: s1 [file s1]

**Table S2.** Quality of work-life questionnaire reliability assessment.

| Questions                                                                                             | Sign | Mean | SD   | Corrected<br>Item-Total<br>Correlation | Cronbach's<br>Alpha<br>if Item<br>Deleted |
|-------------------------------------------------------------------------------------------------------|------|------|------|----------------------------------------|-------------------------------------------|
| 1. I have a clear set of goals and purposes in doing my job.                                          | +    | 3.30 | 1.16 | -0.265                                 | 0.900                                     |
| 2. I feel able to voice opinions and influence changes in my area of work.                            | +    | 2.68 | 1.18 | 0.537                                  | 0.877                                     |
| 3. I have the opportunity to use my abilities at work.                                                | +    | 3.38 | 1.04 | 0.543                                  | 0.877                                     |
| 4. My employer provides adequate facilities and flexibility for me to fit work around my family life. | +    | 2.59 | 1.07 | 0.598                                  | 0.876                                     |
| 5. My current working hours/ patterns suit my personal circumstances.                                 | +    | 2.14 | 0.96 | 0.587                                  | 0.876                                     |
| 6. I often feel under pressure at work.                                                               | -    | 2.34 | 1.17 | -0.020                                 | 0.892                                     |
| 7. When I have done a good job, it is acknowledged by my line manager.                                | +    | 2.96 | 1.19 | 0.557                                  | 0.876                                     |
| 8. Recently, I have been feeling unhappy and depressed.                                               | -    | 2.71 | 1.26 | 0.120                                  | 0.889                                     |
| 9. I am encouraged to develop new skills.                                                             | +    | 2.93 | 1.07 | 0.619                                  | 0.875                                     |
| 10. I am involved in decisions that affect me in my own area of work.                                 | +    | 2.81 | 1.14 | 0.597                                  | 0.875                                     |
| 11. My employer provides me with what I need to do my job effectively.                                | +    | 2.38 | 1.04 | 0.635                                  | 0.875                                     |
| 12. In most ways, my life is close to ideal.                                                          | +    | 1.98 | 0.92 | 0.628                                  | 0.876                                     |
| 13. I work in a safe environment.                                                                     | +    | 2.79 | 1.11 | 0.630                                  | 0.875                                     |
| 14. Generally, things work out well for me.                                                           | +    | 2.80 | 0.98 | 0.754                                  | 0.872                                     |
| 15. I am satisfied with the career opportunities available for me here.                               | +    | 2.85 | 1.13 | 0.716                                  | 0.872                                     |
| 16. I am satisfied with the training I received in order to perform my present job.                   | +    | 2.99 | 1.15 | 0.683                                  | 0.873                                     |
| 17. Recently, I have been feeling reasonably happy all things considered.                             | +    | 2.80 | 1.07 | 0.622                                  | 0.875                                     |
| 18. I have an unachievable deadline.                                                                  | -    | 2.77 | 1.23 | -0.077                                 | 0.874                                     |
| 19. I am able to achieve a healthy balance between my work and home life.                             | +    | 2.46 | 1.08 | 0.589                                  | 0.876                                     |
| 20. I am proud to tell others that I am part of this organization.                                    | +    | 2.70 | 1.11 | 0.650                                  | 0.874                                     |
| 21. I would recommend this organization as a good one to work for.                                    | +    | 2.39 | 1.19 | 0.663                                  | 0.873                                     |
| 22. I am pressured to work long hours.                                                                | -    | 2.69 | 1.35 | -0.161                                 | 0.898                                     |
| 23. I have sufficient opportunities to question managers about the changes at work.                   | +    | 2.22 | 1.10 | 0.702                                  | 0.873                                     |
| 24. I am happy with the physical environment where I usually work.                                    | +    | 2.62 | 1.10 | 0.700                                  | 0.870                                     |
| Test scale (Cronbach's alpha coefficient 24 items)                                                    |      |      |      |                                        | 0.884                                     |
