# Supplementary material for: Burnout and Quality of Work Life among Physicians during Internships in Public Hospitals in Thailand
Source: MDPI journal article supplement (doi:10.3390/bs14050361), 2024-04-25
Supplement: s1 [file s1]

**Table S3.** Quality of work-life (QWL) scales and burnout subscales among intern physicians.

| QWL subscales<br>( <i>n</i> = 241)                 | Min-<br>Max | Mean $\pm$ SD     | Median<br>[IQR] | QWL levels, <i>n</i> (%)     |            |               |
|----------------------------------------------------|-------------|-------------------|-----------------|------------------------------|------------|---------------|
|                                                    |             |                   |                 | Low                          | Moderate   | High          |
| Employee engagement (EET)                          | 2 - 10      | 5.09 $\pm$ 2.12   | 5.0 [4.0]       | 93 (38.6)                    | 115 (47.7) | 33 (13.7)     |
| Control at work (CAW)                              | 3 - 15      | 7.71 $\pm$ 2.80   | 8.0 [4.0]       | 74 (30.7)                    | 132 (54.8) | 35 (14.5)     |
| Homework interface (HWI)                           | 3 - 15      | 7.18 $\pm$ 2.44   | 7.0 [3.0]       | 95 (39.4)                    | 128 (53.1) | 18 (7.5)      |
| General well-being (GWB)                           | 4 - 20      | 10.29 $\pm$ 2.91  | 10.0 [4.0]      | 40 (17.8)                    | 183 (81.3) | 2 (0.9)       |
| Job and career satisfaction (JCS)                  | 6 - 29      | 18.42 $\pm$ 4.44  | 19.0 [5.0]      | 31 (12.9)                    | 157 (65.1) | 53 (22.0)     |
| Working conditions (WCS)                           | 3 - 15      | 7.79 $\pm$ 2.57   | 8.0 [4.0]       | 76 (31.5)                    | 131 (54.4) | 34 (14.1)     |
| Stress at work (SAW)                               | 3 - 15      | 7.80 $\pm$ 2.83   | 7.0 [3.0]       | 86 (35.7)                    | 114 (47.3) | 41 (17.0)     |
| Total scores of QWL                                | 34 - 116    | 64.27 $\pm$ 14.08 | 65.0 [18.0]     | 66 (27.4)                    | 168 (69.7) | 7 (2.9)       |
| Overall<br>(in response with a single<br>question) | 1 - 5       | 2.57 $\pm$ 1.12   | 3.0 [1.0]       | 55 (22.8)                    | 139 (57.7) | 47 (19.5)     |
| Burnout subscales<br>( <i>n</i> = 241)             | Min-<br>Max | Mean $\pm$ SD     | Median<br>[IQR] | Burnout levels, <i>n</i> (%) |            |               |
|                                                    |             |                   |                 | Low                          | Moderate   | High          |
| Emotional exhaustion (EE)                          | 0 - 54      | 36.15 $\pm$ 14.31 | 40.0 [18.0]     | 32 (13.3)                    | 18 (7.5)   | 191<br>(79.3) |
| Depersonalization (DP)                             | 0 - 30      | 14.11 $\pm$ 7.73  | 15.0 [12.0]     | 56 (23.2)                    | 48 (19.9)  | 137<br>(56.8) |
| Personal accomplishment (PA)                       | 0 - 48      | 27.28 $\pm$ 10.50 | 29.0 [14.0]     | 137 (56.8)                   | 76 (31.5)  | 28 (11.6)     |

Emotional exhaustion is classified as low  $\leq$  18 scores, moderate = 19-26 scores, and high  $\geq$  27 scores; Depersonalization is classified as low  $\leq$  5 scores, moderate = 6-9 scores, and high  $\geq$  10 scores; Personal accomplishment is classified as low  $\leq$  33 scores, moderate = 34-39 scores, and high  $\geq$  40 scores.
