# Supplementary material for: Burnout and Quality of Work Life among Physicians during Internships in Public Hospitals in Thailand
Source: MDPI journal article supplement (doi:10.3390/bs14050361), 2024-04-25
Supplement: s1 [file s1]

**Table S4.** Frequency and percentage of quality of work-life levels among intern physicians.

| Item | Questions ( <i>n</i> = 241)                                                                        | <i>n</i> (%)      |            |            |           |                |
|------|----------------------------------------------------------------------------------------------------|-------------------|------------|------------|-----------|----------------|
|      |                                                                                                    | Strongly disagree | Disagree   | Neutral    | Agree     | Strongly agree |
| JCS1 | I have a clear set of goals and purposes in doing my job.                                          | 26 (10.8)         | 25 (10.4)  | 73 (30.3)  | 85 (35.3) | 32 (13.3)      |
| CAW1 | I feel able to voice opinions and influence changes in my area of work.                            | 47 (19.5)         | 62 (25.7)  | 69 (28.6)  | 47 (19.5) | 16 (6.6)       |
| JCS2 | I have the opportunity to use my abilities at work.                                                | 18 (7.5)          | 22 (9.1)   | 77 (32.0)  | 99 (41.1) | 25 (10.4)      |
| HWI1 | My employer provides adequate facilities and flexibility for me to fit work around my family life. | 44 (18.3)         | 67 (27.8)  | 83 (34.4)  | 39 (16.2) | 8 (3.3)        |
| HWI2 | My current working hours/ patterns suit my personal circumstances.                                 | 67 (27.8)         | 100 (41.5) | 51 (21.2)  | 20 (8.3)  | 3 (1.2)        |
| SAW1 | I often feel under pressure at work. ≠                                                             | 53 (22.0)         | 114 (47.3) | 35 (14.5)  | 17 (7.1)  | 22 (9.1)       |
| JCS3 | When I have done a good job, it is acknowledged by my line manager.                                | 46 (19.1)         | 20 (8.3)   | 88 (36.5)  | 71 (29.5) | 16 (6.6)       |
| GWB1 | Recently, I have been feeling unhappy and depressed. ≠                                             | 38 (15.8)         | 88 (36.5)  | 52 (21.6)  | 31 (12.9) | 32 (13.3)      |
| JCS4 | I am encouraged to develop new skills.                                                             | 30 (12.4)         | 44 (18.3)  | 91 (37.8)  | 64 (26.6) | 12 (5.0)       |
| CAW2 | I am involved in decisions that affect me in my own area of work.                                  | 44 (18.3)         | 42 (17.4)  | 80 (33.2)  | 65 (27.0) | 10 (4.1)       |
| WCS1 | My employer provides me with what I need to do my job effectively.                                 | 63 (26.1)         | 58 (24.1)  | 88 (36.5)  | 29 (12.0) | 3 (1.2)        |
| GWB2 | In most ways, my life is close to ideal.                                                           | 87 (36.1)         | 87 (36.1)  | 54 (22.4)  | 11 (4.6)  | 2 (0.8)        |
| WCS2 | I work in a safe environment.                                                                      | 36 (14.9)         | 59 (24.5)  | 77 (32.0)  | 58 (24.1) | 11 (4.6)       |
| GWB3 | Generally, things work out well for me.                                                            | 31 (12.9)         | 47 (19.5)  | 107 (44.4) | 52 (21.6) | 4 (1.7)        |
| JCS5 | I am satisfied with the career opportunities available for me here.                                | 41 (17.0)         | 38 (15.8)  | 90 (37.3)  | 59 (24.5) | 13 (5.4)       |
| JCS6 | I am satisfied with the training I received in order to perform my present job.                    | 38 (15.8)         | 29 (12.0)  | 88 (36.5)  | 69 (28.6) | 17 (7.1)       |
| GWB4 | Recently, I have been feeling reasonably happy all things considered.                              | 44 (18.3)         | 29 (12.0)  | 106 (44.0) | 56 (23.2) | 6 (2.5)        |
| SAW2 | I have an unachievable deadline. ≠                                                                 | 21 (8.7)          | 116 (48.1) | 38 (15.8)  | 29 (12.0) | 37 (15.4)      |
| HWI4 | I am able to achieve a healthy balance between my work and home life.                              | 53 (22.0)         | 76 (31.5)  | 68 (28.2)  | 37 (15.4) | 7 (2.9)        |
| EET1 | I am proud to tell others that I am part of this organization.                                     | 44 (18.3)         | 53 (22.0)  | 85 (35.3)  | 49 (20.3) | 10 (4.1)       |
| EET2 | I would recommend this organization as a good one to work for.                                     | 75 (31.1)         | 54 (22.4)  | 66 (27.4)  | 36 (14.9) | 10 (4.1)       |
| SAW3 | I am pressured to work long hours. ≠                                                               | 47 (19.5)         | 85 (35.3)  | 45 (18.7)  | 23 (9.5)  | 41 (17.0)      |
| CAW4 | I have sufficient opportunities to question managers about the changes at work.                    | 78 (32.4)         | 72 (29.9)  | 59 (24.5)  | 25 (10.4) | 7 (2.9)        |
| WCS3 | I am happy with the physical environment where I usually work.                                     | 50 (20.7)         | 51 (21.2)  | 88 (36.5)  | 45 (18.7) | 7 (2.9)        |

| Item | Questions ( <i>n</i> = 241)                                 | <i>n</i> (%)      |           |           |           |                |
|------|-------------------------------------------------------------|-------------------|-----------|-----------|-----------|----------------|
|      |                                                             | Strongly disagree | Disagree  | Neutral   | Agree     | Strongly agree |
| OVL  | I am satisfied with the overall quality of my working life. | 55 (22.8)         | 50 (22.8) | 89 (36.9) | 38 (15.8) | 9 (3.7)        |

≠ Negative question; *n* = Number of responses in each question. Abbreviations: EET, Employee engagement; CAW, Control at work; HWI, Homework interface; GWB, General well-being; JCS, Job and career satisfaction; WCS, Working conditions; SAW, Stress at work; OVL, Overall (in response with a single question).
