# Supplementary material for: Burnout and Quality of Work Life among Physicians during Internships in Public Hospitals in Thailand
Source: MDPI journal article supplement (doi:10.3390/bs14050361), 2024-04-25
Supplement: s1 [file s1]

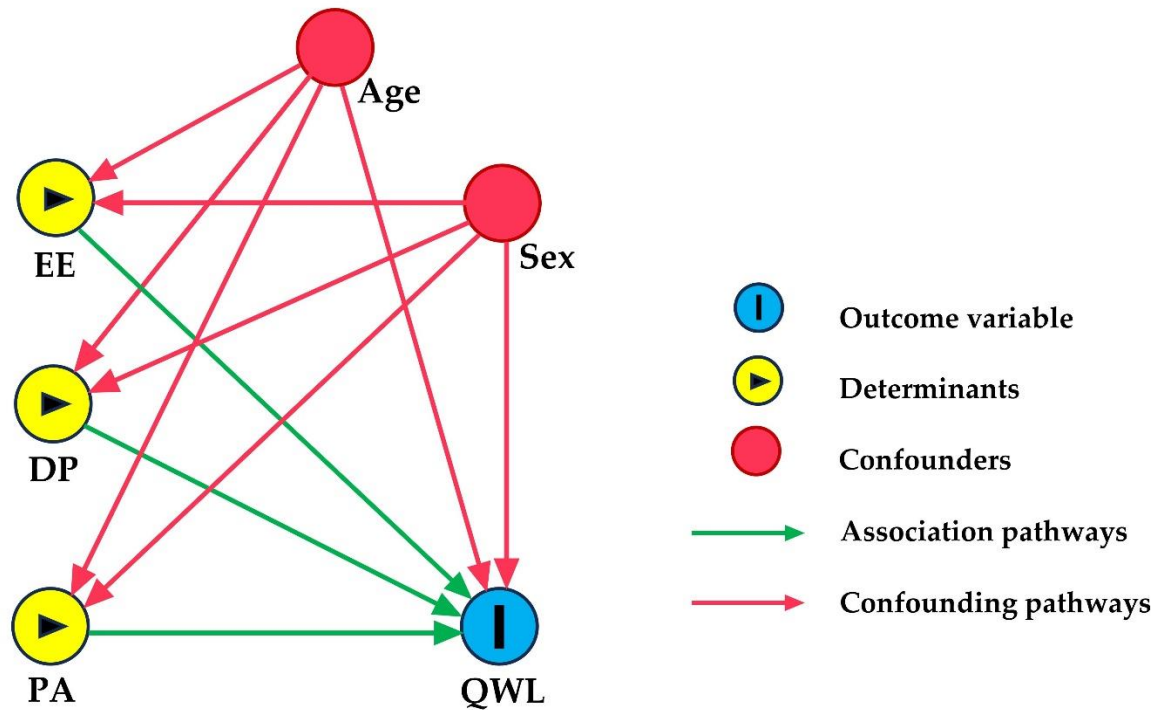

**Supplementary Figure S1.** The directed acyclic graph (DAG), concerning the statistic modeling of multivariable logistic regression, was generated with publication licensed by BioRender, Toronto, Canada (Agreement number: QG237SORHP, 19 November 2021). Green arrows indicate the significant association pathways; red arrows represent confounding pathways; red ellipses represent confounders; blue ellipses represent the dependent variable; yellow ellipses represent determinants; and blue ellipses represent the outcome variable.
